# Supplementary material for: Benchmarking ionization potentials using the simple pCCD model
Source: Royal Society of Chemistry journal article supplement (doi:10.1039/d3cp01963b), 2023-01-01
Supplement: d3cp01963b1.pdf [file d3cp01963b1.pdf]

# **Benchmarking ionization potentials from the simple pCCD model**

Saddem Mamache, Marta Gałyńska, Katharina Boguslawski<sup>†</sup>

Institute of Physics, Faculty of Physics, Astronomy, and Informatics, Nicolaus Copernicus University in Toruń, Grudziadzka 5,  
87-100 Toruń, Poland

<sup>†</sup>E-mail: k.boguslawski@fizyka.umk.pl

**Electronic Supplementary Information**

## S1 Ionization potentials

| Compound                      | Irrep.           | Exp.  | CCSDT | RHF(1h) | RHF(2h1p) | PM(1h) | PM(2h1p) | pCCD(1h) | pCCD(2h1p) |
|-------------------------------|------------------|-------|-------|---------|-----------|--------|----------|----------|------------|
| C <sub>2</sub> F <sub>4</sub> | 2b <sub>3u</sub> | 10.69 | 10.37 | 11.40   | 8.22      | 11.24  | 8.10     | 11.64    | 8.57       |
|                               | 4b <sub>3g</sub> | 15.90 | 15.78 | 18.41   | 13.05     | 18.54  | 13.62    | 19.02    | 14.22      |
|                               | 6a <sub>g</sub>  | 15.90 | 15.78 | 18.41   | 13.49     | 18.71  | 13.18    | 19.11    | 13.74      |
|                               | 4b <sub>2u</sub> | 16.60 | 16.32 | 19.00   | 13.62     | 19.16  | 13.74    | 19.58    | 14.31      |
|                               | 1a <sub>u</sub>  | 15.90 | 15.78 | 18.41   | 13.86     | 19.56  | 14.04    | 19.90    | 14.54      |
|                               | 1b <sub>1g</sub> | 16.60 | 16.64 | 19.55   | 14.05     | 19.74  | 14.23    | 20.07    | 14.73      |
|                               | 5b <sub>1u</sub> | 17.60 | 17.32 | 20.16   | 14.75     | 20.32  | 14.89    | 20.69    | 15.42      |
|                               | 1b <sub>2g</sub> | 18.20 | 18.02 | 20.85   | 15.50     | 21.04  | 15.66    | 21.34    | 16.11      |
|                               | 1b <sub>3u</sub> | 19.40 | 19.12 | 21.61   | 17.01     | 22.20  | 17.16    | 22.50    | 17.63      |
|                               | 3b <sub>3g</sub> | 19.40 | 19.41 | 21.99   | 16.63     | 21.73  | 16.72    | 22.29    | 17.40      |
| 3b <sub>2u</sub>              | 21.00            | 20.76 | 23.05 | 18.05   | 23.17     | 18.66  | 24.21    | 19.29    |            |
| 5a <sub>g</sub>               | 21.00            | 21.03 | 23.62 | 18.57   | 25.18     | 19.88  | 25.68    | 20.52    |            |
| HCCF                          | 2π               | 11.50 | 11.34 | 11.76   | 9.45      | 11.61  | 9.31     | 12.01    | 9.77       |
|                               | 1π               | 18.00 | 17.90 | 20.86   | 15.51     | 20.92  | 15.51    | 21.12    | 15.94      |
|                               | 7σ               | 18.00 | 18.12 | 19.95   | 16.48     | 19.93  | 16.42    | 20.39    | 17.04      |
|                               | 6σ               | 21.20 | 20.95 | 23.56   | 18.48     | 23.60  | 18.48    | 23.96    | 19.03      |
|                               | 5σ               | 24.30 | 24.40 | 28.68   | 23.15     | 28.72  | 23.14    | 29.21    | 23.86      |
| HCCCN                         | 2π               | 11.75 | 11.69 | 11.94   | 9.49      | 11.87  | 9.42     | 12.37    | 10.05      |
|                               | 9σ               | 13.54 | 13.44 | 16.22   | 11.21     | 16.26  | 11.16    | 16.57    | 11.84      |
|                               | 1π               | 14.18 | 14.19 | 15.09   | 12.02     | 15.12  | 12.00    | 15.59    | 12.67      |
|                               | 8σ               | 18.30 | 18.53 | 20.76   | 16.84     | 20.79  | 16.80    | 21.09    | 17.46      |
|                               | 7σ               | 21.30 | 21.55 | 24.83   | 19.69     | 24.85  | 19.67    | 25.13    | 20.33      |
|                               | 6σ               | 25.00 | 25.31 | 29.87   | 23.27     | 29.92  | 23.26    | 30.06    | 23.97      |
| C <sub>2</sub> N <sub>2</sub> | 1π <sub>g</sub>  | 13.51 | 13.48 | 13.85   | 11.21     | 13.63  | 10.97    | 14.32    | 11.80      |
|                               | 5σ <sub>g</sub>  | 14.49 | 14.40 | 17.11   | 13.61     | 17.09  | 12.09    | 17.40    | 12.84      |
|                               | 4σ <sub>u</sub>  | 14.86 | 14.77 | 17.55   | 13.61     | 17.52  | 12.44    | 17.83    | 13.20      |
|                               | 1π <sub>u</sub>  | 15.60 | 15.70 | 16.58   | 12.42     | 16.44  | 13.40    | 17.04    | 14.24      |
|                               | 4σ <sub>g</sub>  | 22.80 | 23.29 | 26.91   | 21.69     | 26.86  | 21.56    | 27.11    | 22.25      |
| CO                            | 5σ               | 14.01 | 13.09 | 15.49   | 12.69     | 15.53  | 12.73    | 15.53    | 12.92      |
|                               | 1π               | 16.91 | 16.95 | 17.78   | 14.58     | 17.65  | 14.45    | 18.28    | 15.13      |
|                               | 4σ               | 19.72 | 19.54 | 22.09   | 17.31     | 22.12  | 17.29    | 22.51    | 17.81      |
| CO <sub>2</sub>               | 1π <sub>g</sub>  | 13.79 | 13.63 | 15.11   | 11.13     | 14.92  | 10.93    | 15.35    | 11.47      |
|                               | 1π <sub>u</sub>  | 17.60 | 17.05 | 19.64   | 15.49     | 19.57  | 15.36    | 19.97    | 15.87      |
|                               | 3σ <sub>u</sub>  | 18.08 | 17.84 | 20.33   | 15.50     | 20.27  | 15.38    | 20.74    | 15.97      |
|                               | 4σ <sub>g</sub>  | 19.40 | 19.08 | 21.90   | 16.91     | 21.85  | 16.78    | 22.27    | 17.33      |
| C <sub>3</sub> O <sub>2</sub> | 2π <sub>u</sub>  | 10.80 | 10.62 | 11.50   | 8.31      | 11.31  | 8.13     | 11.46    | 8.49       |
|                               | 1π <sub>g</sub>  | 15.00 | 14.92 | 17.59   | 12.59     | 17.65  | 12.50    | 18.18    | 13.15      |
|                               | 1π <sub>u</sub>  | 16.00 | 15.72 | 18.44   | 13.66     | 18.51  | 13.59    | 18.91    | 14.07      |
|                               | 5σ <sub>u</sub>  | 17.30 | 17.10 | 20.53   | 14.75     | 20.62  | 14.69    | 21.04    | 15.29      |
|                               | 6σ <sub>g</sub>  | 17.80 | 17.28 | 20.84   | 14.96     | 20.94  | 14.90    | 21.35    | 15.49      |
|                               | 4σ <sub>u</sub>  | 21.90 | 22.22 | 25.83   | 20.70     | 25.82  | 20.63    | 26.05    | 21.08      |
|                               | 5σ <sub>g</sub>  | 25.60 | 25.88 | 30.42   | 24.06     | 30.46  | 23.92    | 30.62    | 24.39      |
| OCS                           | 2π               | 11.24 | 11.12 | 11.78   | 9.34      | 11.62  | 9.19     | 11.80    | 9.53       |
|                               | 1π               | 15.53 | 15.61 | 18.23   | 13.56     | 18.22  | 13.45    | 18.86    | 14.05      |
|                               | 4σ               | 16.04 | 15.83 | 17.50   | 14.04     | 17.49  | 13.99    | 17.57    | 14.30      |
|                               | 3σ               | 17.96 | 17.89 | 21.39   | 15.86     | 21.43  | 15.80    | 21.99    | 16.32      |
| FCN                           | 2π               | 13.65 | 13.50 | 14.11   | 11.51     | 13.98  | 11.37    | 14.45    | 11.91      |

|                               |             |       |       |       |       |       |       |       |       |
|-------------------------------|-------------|-------|-------|-------|-------|-------|-------|-------|-------|
|                               | $7\sigma$   | 14.56 | 14.31 | 16.54 | 12.28 | 16.54 | 12.22 | 16.86 | 12.75 |
|                               | $1\pi$      | 19.30 | 19.39 | 22.35 | 17.21 | 22.37 | 17.18 | 22.54 | 17.61 |
|                               | $6\sigma$   | 22.60 | 22.79 | 25.44 | 20.44 | 25.39 | 20.34 | 25.61 | 20.80 |
| N <sub>2</sub>                | $3\sigma_g$ | 15.58 | 15.45 | 17.46 | 13.65 | 17.46 | 13.65 | 17.63 | 14.02 |
|                               | $1\pi_u$    | 16.93 | 16.89 | 17.30 | 15.13 | 17.30 | 15.13 | 17.56 | 15.47 |
|                               | $2\sigma_u$ | 18.75 | 18.67 | 21.48 | 16.90 | 21.48 | 16.90 | 21.62 | 17.23 |
| HC <sub>4</sub> H             | $1\pi_g$    | 10.30 | 10.20 | 10.34 | 8.04  | 10.25 | 7.97  | 10.78 | 8.57  |
|                               | $1\pi_u$    | 12.71 | 12.70 | 13.59 | 10.59 | 13.57 | 10.56 | 14.02 | 11.19 |
|                               | $5\sigma_g$ | 17.00 | 17.14 | 19.30 | 15.18 | 19.36 | 15.17 | 19.74 | 15.87 |
|                               | $4\sigma_u$ | 17.50 | 17.82 | 20.07 | 16.06 | 20.16 | 16.05 | 20.54 | 16.81 |
|                               | $4\sigma_g$ | 20.00 | 20.05 | 23.26 | 18.11 | 23.31 | 18.10 | 23.63 | 18.84 |
|                               | $3\sigma_u$ | 23.30 | 23.42 | 27.80 | 21.88 | 27.87 | 21.09 | 28.04 | 22.03 |
|                               | $3\sigma_g$ | 25.00 | 24.76 | 29.73 | 22.49 | 29.80 | 22.45 | 29.99 | 22.61 |
| HCl                           | $2\pi$      | 12.77 | 12.58 | 13.36 | 11.18 | 13.20 | 11.01 | 13.44 | 11.30 |
|                               | $5\sigma$   | 16.60 | 16.57 | 17.36 | 15.13 | 17.22 | 14.99 | 17.55 | 15.36 |
|                               | $4\sigma$   | 25.80 | 26.63 | 30.51 | 23.64 | 30.56 | 23.56 | 30.69 | 23.93 |
| HF                            | $1\pi$      | 16.19 | 15.90 | 17.85 | 13.54 | 17.76 | 13.44 | 18.19 | 13.95 |
|                               | $3\sigma$   | 19.90 | 19.83 | 21.03 | 17.53 | 20.91 | 17.40 | 21.46 | 18.00 |
| F <sub>2</sub>                | $1\pi_g$    | 15.87 | 15.58 | 18.34 | 13.01 | 18.34 | 13.01 | 18.67 | 13.59 |
|                               | $1\pi_u$    | 18.80 | 18.74 | 22.21 | 16.40 | 22.21 | 16.40 | 22.55 | 17.05 |
|                               | $3\sigma_g$ | 21.10 | 20.96 | 21.90 | 18.58 | 21.90 | 18.58 | 22.43 | 19.14 |
| SiO                           | $7\sigma$   | 11.61 | 11.33 | 12.19 | 9.28  | 12.23 | 9.30  | 12.57 | 9.83  |
|                               | $2\pi$      | 12.19 | 11.87 | 13.05 | 9.23  | 13.03 | 9.21  | 13.57 | 9.84  |
|                               | $6\sigma$   | 14.80 | 14.58 | 16.69 | 13.17 | 16.83 | 13.33 | 17.14 | 13.70 |
| CS                            | $7\sigma$   | 11.34 | 11.26 | 13.09 | 9.76  | 13.13 | 9.77  | 13.19 | 10.07 |
|                               | $2\pi$      | 12.90 | 12.88 | 13.05 | 11.30 | 12.79 | 11.06 | 13.20 | 11.49 |
|                               | $6\sigma$   | 18.03 | 18.08 | 19.08 | 15.00 | 19.15 | 14.93 | 19.27 | 15.32 |
| P <sub>2</sub>                | $2\pi_u$    | 10.65 | 10.51 | 10.56 | 9.09  | 10.56 | 9.09  | 10.69 | 9.26  |
|                               | $5\sigma_g$ | 10.84 | 10.65 | 11.30 | 9.13  | 11.30 | 9.13  | 11.28 | 9.19  |
| H <sub>2</sub> CO             | $2b_2$      | 10.90 | 10.75 | 12.21 | 8.37  | 12.24 | 8.32  | 12.83 | 9.08  |
|                               | $1b_1$      | 14.50 | 14.50 | 15.12 | 12.06 | 14.80 | 11.77 | 15.67 | 12.73 |
|                               | $5a_1$      | 16.10 | 15.96 | 17.91 | 13.49 | 17.87 | 13.37 | 18.43 | 14.15 |
|                               | $1b_2$      | 17.00 | 17.10 | 19.04 | 15.61 | 19.05 | 15.52 | 19.54 | 16.32 |
|                               | $4a_1$      | 21.40 | 21.30 | 23.86 | 20.03 | 23.84 | 19.92 | 24.31 | 20.72 |
| H <sub>2</sub> O              | $1b_1$      | 12.62 | 12.45 | 14.11 | 10.29 | 13.95 | 10.12 | 14.40 | 10.69 |
|                               | $3a_1$      | 14.74 | 14.69 | 15.99 | 12.46 | 15.90 | 12.34 | 16.40 | 12.92 |
|                               | $1b_2$      | 18.55 | 18.84 | 19.58 | 16.73 | 19.45 | 16.57 | 20.16 | 17.36 |
| C <sub>2</sub> H <sub>4</sub> | $1b_{3u}$   | 10.68 | 10.64 | 10.80 | 8.82  | 10.43 | 8.46  | 11.14 | 9.24  |
|                               | $1b_{3g}$   | 12.80 | 13.08 | 13.95 | 11.39 | 13.90 | 11.27 | 14.64 | 12.20 |
|                               | $3a_g$      | 14.80 | 14.79 | 16.10 | 12.90 | 16.04 | 12.79 | 16.59 | 13.54 |
|                               | $1b_{2u}$   | 16.00 | 16.14 | 17.63 | 14.43 | 17.58 | 14.24 | 18.24 | 15.24 |
|                               | $2b_{1u}$   | 19.10 | 19.32 | 21.68 | 17.79 | 21.63 | 17.58 | 22.28 | 18.62 |
|                               | $2a_g$      | 23.60 | 23.87 | 28.19 | 22.40 | 28.20 | 22.22 | 28.64 | 23.12 |
| H <sub>2</sub> CS             | $3b_2$      | 9.38  | 9.25  | 9.83  | 7.65  | 9.76  | 7.51  | 10.22 | 8.05  |
|                               | $2b_1$      | 11.76 | 11.78 | 11.96 | 10.14 | 11.51 | 9.71  | 12.20 | 10.43 |
|                               | $7a_1$      | 13.85 | 13.88 | 14.86 | 12.05 | 14.85 | 11.98 | 15.20 | 12.48 |
|                               | $2b_2$      | 15.20 | 15.61 | 17.71 | 13.86 | 17.69 | 14.07 | 18.09 | 14.96 |

|                                                  |        |       |       |       |       |       |       |       |       |
|--------------------------------------------------|--------|-------|-------|-------|-------|-------|-------|-------|-------|
|                                                  | $6a_1$ | 19.90 | 19.60 | 22.28 | 17.36 | 22.31 | 17.15 | 22.71 | 17.98 |
| HCONH <sub>2</sub>                               | $10a'$ | 10.40 | 10.17 | 11.95 | 7.60  | 12.03 | 7.65  | 12.67 | 8.38  |
|                                                  | $2a''$ | 10.70 | 10.56 | 11.68 | 8.06  | 11.64 | 8.05  | 12.09 | 8.61  |
|                                                  | $1a''$ | 14.10 | 14.06 | 15.74 | 11.93 | 15.73 | 11.93 | 16.26 | 12.52 |
|                                                  | $9a'$  | 14.80 | 14.67 | 16.64 | 12.15 | 16.73 | 12.20 | 17.33 | 12.94 |
|                                                  | $8a'$  | 16.30 | 16.55 | 18.42 | 14.70 | 18.53 | 14.79 | 19.03 | 15.45 |
|                                                  | $7a'$  | 18.80 | 19.25 | 20.55 | 16.81 | 20.63 | 16.85 | 21.08 | 17.50 |
|                                                  | $6a'$  | 20.70 | 20.90 | 23.27 | 19.18 | 23.37 | 19.23 | 23.81 | 19.94 |
| HCOOH                                            | $10a'$ | 11.50 | 11.33 | 13.00 | 8.72  | 13.07 | 8.77  | 13.67 | 9.46  |
|                                                  | $2a''$ | 12.60 | 12.47 | 13.78 | 9.83  | 13.72 | 9.81  | 14.32 | 10.45 |
|                                                  | $9a'$  | 14.80 | 14.79 | 16.54 | 12.32 | 16.64 | 12.41 | 17.09 | 13.02 |
|                                                  | $1a''$ | 15.80 | 15.71 | 17.50 | 13.43 | 17.55 | 13.49 | 18.00 | 14.11 |
|                                                  | $8a'$  | 17.10 | 17.06 | 19.47 | 14.67 | 19.57 | 14.74 | 20.05 | 15.34 |
|                                                  | $7a'$  | 17.80 | 17.81 | 19.83 | 15.87 | 19.91 | 15.94 | 20.32 | 16.59 |
|                                                  | $6a'$  | 22.00 | 22.08 | 24.51 | 20.42 | 24.59 | 20.50 | 25.03 | 21.18 |
| NSF                                              | $13a'$ | 11.82 | 11.62 | 12.93 | 9.31  | 12.87 | 9.23  | 13.10 | 9.68  |
|                                                  | $12a'$ | 13.50 | 13.30 | 15.18 | 11.08 | 15.26 | 11.12 | 15.49 | 11.56 |
|                                                  | $3a''$ | 13.87 | 13.74 | 14.55 | 11.48 | 14.32 | 11.32 | 14.86 | 11.89 |
|                                                  | $11a'$ | 15.62 | 15.24 | 18.16 | 12.85 | 18.29 | 12.90 | 18.55 | 13.36 |
|                                                  | $2a''$ | 16.47 | 16.11 | 18.91 | 14.14 | 18.95 | 14.08 | 19.32 | 14.57 |
|                                                  | $10a'$ | 17.20 | 16.35 | 19.04 | 14.24 | 19.14 | 14.28 | 19.50 | 14.81 |
| O <sub>3</sub>                                   | $6a_1$ | 12.73 | 12.54 | 15.10 | 10.06 | 15.20 | 9.97  | 15.42 | 10.82 |
|                                                  | $4b_2$ | 13.00 | 12.69 | 15.45 | 10.22 | 15.53 | 10.09 | 15.98 | 11.13 |
|                                                  | $1a_2$ | 13.54 | 13.46 | 14.58 | 10.86 | 14.00 | 10.32 | 15.71 | 12.01 |
|                                                  | $1b_1$ | 19.99 | 21.32 | 21.86 | 14.93 | 21.70 | 14.59 | 21.67 | 14.98 |
| gem-C <sub>2</sub> H <sub>2</sub> F <sub>2</sub> | $2b_1$ | 10.70 | 10.54 | 11.15 | 8.56  | 10.91 | 8.34  | 11.54 | 9.01  |
|                                                  | $5b_2$ | 14.90 | 14.96 | 16.48 | 13.79 | 16.46 | 13.73 | 17.15 | 14.56 |
|                                                  | $8a_1$ | 15.80 | 15.52 | 17.42 | 13.05 | 17.44 | 13.04 | 17.94 | 13.69 |
|                                                  | $4b_2$ | 16.10 | 15.85 | 18.28 | 12.52 | 18.28 | 12.47 | 18.70 | 13.14 |
|                                                  | $1a_2$ | 16.10 | 16.02 | 18.89 | 13.40 | 18.90 | 13.36 | 19.34 | 14.04 |
|                                                  | $7a_1$ | 18.20 | 18.27 | 20.54 | 16.09 | 20.58 | 16.07 | 21.04 | 16.79 |
|                                                  | $1b_1$ | 18.20 | 18.10 | 20.88 | 15.77 | 20.91 | 15.73 | 21.32 | 16.40 |
|                                                  | $3b_2$ | 19.70 | 19.63 | 21.98 | 17.04 | 21.99 | 16.98 | 22.47 | 17.71 |
|                                                  | $6a_1$ | 21.50 | 21.41 | 24.23 | 19.17 | 24.25 | 19.11 | 24.72 | 19.87 |
|                                                  | $5a_1$ | 25.20 | 25.10 | 29.24 | 23.42 | 29.28 | 23.35 | 29.63 | 24.12 |
| cis-C <sub>2</sub> H <sub>2</sub> F <sub>2</sub> | $2b_1$ | 10.62 | 10.39 | 11.04 | 8.27  | 10.82 | 8.10  | 11.46 | 8.79  |
|                                                  | $7a_1$ | 14.00 | 13.88 | 15.80 | 11.42 | 15.92 | 12.33 | 16.35 | 12.13 |
|                                                  | $6b_2$ | 14.90 | 14.80 | 16.90 | 12.21 | 17.04 | 11.53 | 17.51 | 12.93 |
|                                                  | $1a_2$ | 16.20 | 16.07 | 18.81 | 13.38 | 18.95 | 13.50 | 19.33 | 14.07 |
|                                                  | $5b_2$ | 17.10 | 16.85 | 19.10 | 14.51 | 19.25 | 15.87 | 19.68 | 15.33 |
|                                                  | $1b_1$ | 17.10 | 16.97 | 19.51 | 14.47 | 19.67 | 14.58 | 20.07 | 15.20 |
|                                                  | $6a_1$ | 18.80 | 18.50 | 20.60 | 15.81 | 20.69 | 14.61 | 21.19 | 16.55 |
|                                                  | $5a_1$ | 18.80 | 18.88 | 21.23 | 16.91 | 21.37 | 18.84 | 21.76 | 17.66 |
|                                                  | $4b_2$ | 20.90 | 20.85 | 23.46 | 18.79 | 23.58 | 16.98 | 24.05 | 19.59 |
|                                                  | $4a_1$ | 25.20 | 24.61 | 29.05 | 23.15 | 29.13 | 23.10 | 29.45 | 24.00 |
| CH <sub>4</sub>                                  | $1t_2$ | 13.60 | 14.35 | 15.06 | 12.78 | 15.07 | 12.80 | 15.67 | 13.48 |
|                                                  | $2a_1$ | 22.90 | 23.11 | 25.80 | 21.78 | 25.90 | 21.88 | 26.44 | 22.62 |
| CH <sub>3</sub> CCH                              | $2e$   | 10.54 | 10.46 | 10.63 | 8.39  | 10.62 | 8.39  | 11.21 | 9.05  |
|                                                  | $1e$   | 14.60 | 15.17 | 16.26 | 13.42 | 16.35 | 13.51 | 16.86 | 14.20 |
|                                                  | $7a_1$ | 15.40 | 15.22 | 16.85 | 13.11 | 16.90 | 13.15 | 17.34 | 13.81 |
|                                                  | $6a_1$ | 17.40 | 17.65 | 19.62 | 15.86 | 19.71 | 15.92 | 20.19 | 16.69 |

|                                |                  |       |       |       |       |       |       |       |       |
|--------------------------------|------------------|-------|-------|-------|-------|-------|-------|-------|-------|
| CH <sub>3</sub> CN             | 2e               | 12.46 | 12.45 | 12.72 | 10.15 | 12.73 | 10.16 | 13.44 | 10.95 |
|                                | 7a <sub>1</sub>  | 13.17 | 12.97 | 15.26 | 10.69 | 15.31 | 10.73 | 15.71 | 11.41 |
|                                | 1e               | 15.70 | 16.24 | 17.33 | 14.59 | 17.39 | 14.65 | 17.87 | 15.32 |
|                                | 6a <sub>1</sub>  | 17.40 | 17.38 | 19.15 | 15.43 | 19.21 | 15.48 | 19.62 | 16.11 |
|                                | 5a <sub>1</sub>  | 24.90 | 24.88 | 28.45 | 23.58 | 28.54 | 23.69 | 28.93 | 24.47 |
| CH <sub>3</sub> NC             | 7a <sub>1</sub>  | 11.32 | 11.21 | 13.02 | 9.64  | 13.15 | 9.79  | 13.31 | 10.16 |
|                                | 2e               | 12.50 | 12.55 | 13.01 | 10.23 | 13.09 | 10.31 | 13.69 | 10.97 |
|                                | 1e               | 16.10 | 16.59 | 17.64 | 14.69 | 17.74 | 14.80 | 18.34 | 15.52 |
|                                | 6a <sub>1</sub>  | 18.20 | 18.38 | 20.22 | 16.16 | 20.29 | 16.24 | 20.85 | 16.96 |
|                                | 5a <sub>1</sub>  | 25.00 | 25.06 | 28.02 | 23.30 | 28.13 | 23.43 | 28.62 | 24.19 |
| NH <sub>3</sub>                | 3a <sub>1</sub>  | 10.80 | 10.74 | 11.87 | 8.80  | 11.80 | 8.74  | 12.24 | 9.25  |
|                                | 1e               | 16.00 | 16.48 | 17.21 | 14.58 | 17.20 | 14.57 | 17.84 | 15.29 |
| CH <sub>3</sub> F              | 2e               | 13.10 | 13.17 | 14.54 | 10.76 | 14.61 | 10.85 | 15.21 | 11.52 |
|                                | 5a <sub>1</sub>  | 17.00 | 17.01 | 18.47 | 14.37 | 18.43 | 14.34 | 19.13 | 15.13 |
|                                | 1e               | 17.00 | 17.04 | 18.94 | 15.10 | 19.05 | 15.17 | 19.56 | 15.88 |
|                                | 4a <sub>1</sub>  | 23.40 | 23.51 | 26.07 | 22.02 | 26.12 | 22.07 | 26.70 | 22.86 |
| CH <sub>2</sub> F <sub>2</sub> | 2b <sub>1</sub>  | 13.30 | 13.29 | 14.72 | 10.98 | 14.83 | 11.12 | 15.38 | 11.75 |
|                                | 4b <sub>2</sub>  | 15.40 | 14.92 | 17.27 | 12.07 | 17.36 | 12.18 | 17.85 | 12.79 |
|                                | 6a <sub>1</sub>  | 15.40 | 15.20 | 16.98 | 12.57 | 17.10 | 12.70 | 17.65 | 13.33 |
|                                | 1a <sub>2</sub>  | 15.80 | 15.59 | 18.20 | 12.87 | 18.33 | 13.02 | 18.75 | 13.59 |
|                                | 3b <sub>2</sub>  | 19.10 | 18.75 | 20.62 | 15.95 | 20.69 | 16.03 | 21.29 | 16.74 |
|                                | 5a <sub>1</sub>  | 19.10 | 18.97 | 21.00 | 16.59 | 21.11 | 16.72 | 21.62 | 17.38 |
|                                | 1b <sub>1</sub>  | 19.10 | 19.15 | 21.25 | 17.29 | 21.39 | 17.42 | 21.84 | 18.05 |
| CHF <sub>3</sub>               | 6a <sub>1</sub>  | 14.80 | 14.76 | 16.38 | 12.38 | 16.50 | 12.53 | 17.03 | 13.14 |
|                                | 1a <sub>2</sub>  | 15.50 | 15.33 | 17.84 | 12.53 | 17.99 | 12.70 | 18.41 | 13.26 |
|                                | 5e               | 16.20 | 15.93 | 18.27 | 13.12 | 18.42 | 13.30 | 18.88 | 13.87 |
|                                | 4e               | 17.20 | 16.99 | 19.44 | 14.31 | 19.61 | 14.50 | 20.04 | 15.05 |
|                                | 3e               | 20.70 | 20.41 | 22.59 | 17.77 | 22.70 | 17.90 | 23.20 | 18.53 |
|                                | 5a <sub>1</sub>  | 20.70 | 20.93 | 23.18 | 18.83 | 23.32 | 18.98 | 23.76 | 19.59 |
|                                | 4a <sub>1</sub>  | 24.40 | 24.43 | 27.06 | 22.50 | 27.17 | 22.63 | 27.67 | 23.27 |
| C <sub>2</sub> H <sub>6</sub>  | 1e <sub>g</sub>  | 12.00 | 12.68 | 13.36 | 10.90 | 13.48 | 11.03 | 14.13 | 11.75 |
|                                | 3a <sub>1g</sub> | 12.70 | 13.06 | 14.05 | 11.00 | 14.06 | 11.02 | 14.62 | 11.65 |
|                                | 2e <sub>u</sub>  | 15.00 | 15.38 | 16.36 | 13.62 | 16.47 | 13.75 | 17.05 | 14.43 |
|                                | 2b <sub>u</sub>  | 20.40 | 20.69 | 22.97 | 19.15 | 23.12 | 19.31 | 23.68 | 20.06 |
|                                | 2a <sub>1g</sub> | 23.90 | 24.15 | 27.78 | 22.76 | 27.91 | 22.91 | 28.43 | 23.66 |
| NNO                            | 2π               | 12.89 | 12.74 | 13.79 | 10.19 | 13.65 | 10.06 | 13.97 | 10.43 |
|                                | 7σ               | 16.38 | 16.28 | 19.19 | 14.43 | 19.22 | 14.41 | 19.60 | 14.93 |
|                                | 1π               | 18.23 | 18.31 | 21.00 | 16.38 | 21.05 | 16.38 | 21.33 | 16.86 |
|                                | 6σ               | 20.11 | 19.89 | 22.81 | 17.39 | 22.84 | 17.34 | 22.94 | 17.73 |
| CF <sub>4</sub>                | 1t <sub>1</sub>  | 16.20 | 16.09 | 18.66 | 13.37 | 18.82 | 13.56 | 19.22 | 14.09 |
|                                | 4t <sub>2</sub>  | 17.40 | 17.24 | 19.42 | 14.48 | 19.57 | 14.66 | 20.05 | 15.24 |
|                                | 1e               | 18.50 | 18.18 | 20.84 | 15.67 | 21.01 | 15.87 | 21.39 | 16.38 |
|                                | 3t <sub>2</sub>  | 22.10 | 21.93 | 24.31 | 19.45 | 24.42 | 19.59 | 24.87 | 20.16 |
|                                | 4a <sub>1</sub>  | 25.10 | 24.85 | 27.60 | 22.57 | 27.70 | 22.69 | 28.17 | 23.28 |
| C <sub>2</sub> H <sub>2</sub>  | 1π <sub>u</sub>  | 11.49 | 11.42 | 11.59 | 9.63  | 11.34 | 9.40  | 11.91 | 10.06 |
|                                | 3σ <sub>g</sub>  | 16.70 | 17.12 | 18.72 | 15.44 | 18.66 | 15.31 | 19.14 | 16.07 |
|                                | 2σ <sub>u</sub>  | 18.70 | 19.00 | 21.09 | 17.07 | 21.02 | 17.23 | 21.54 | 18.10 |
|                                | 2σ <sub>g</sub>  | 23.50 | 23.70 | 28.07 | 22.39 | 28.08 | 22.31 | 28.28 | 22.86 |

|                  |           |       |       |       |       |       |       |       |       |
|------------------|-----------|-------|-------|-------|-------|-------|-------|-------|-------|
| HCN              | $1\pi$    | 13.61 | 13.72 | 13.98 | 11.78 | 13.79 | 11.61 | 14.35 | 12.25 |
|                  | $5\sigma$ | 14.01 | 13.84 | 16.05 | 11.80 | 16.05 | 11.70 | 16.34 | 12.26 |
|                  | $4\sigma$ | 19.86 | 20.43 | 22.44 | 19.10 | 22.39 | 18.99 | 22.72 | 19.62 |
| SiF <sub>4</sub> | $1t_1$    | 16.40 | 16.23 | 18.50 | 13.60 | 18.68 | 13.81 | 19.12 | 14.34 |
|                  | $5t_2$    | 17.50 | 17.24 | 19.39 | 14.65 | 19.58 | 14.87 | 20.02 | 15.39 |
|                  | $1e$      | 18.10 | 17.63 | 19.86 | 15.16 | 20.04 | 15.37 | 20.46 | 15.87 |
|                  | $4t_2$    | 19.50 | 19.17 | 21.30 | 16.74 | 21.47 | 16.95 | 21.89 | 17.44 |
|                  | $5a_1$    | 21.55 | 21.27 | 23.46 | 18.99 | 23.60 | 19.16 | 24.02 | 19.64 |

Table S1: Ionization potentials (IPs) [eV] for selected states determined from various IP-EOM-pCCD methods. IP-EOM-CCSDT and experimental reference data is given for comparison and taken from Ref. 1. All listed IPs were computed using the cc-pVTZ basis set and employing geometries optimized at the CCSD(T)/aug-cc-pVTZ level of theory, as provided in the supplementary information of Ref. 1. Irrep. indicates the leading configuration, where an electron is removed.

## S2 Correlation plots

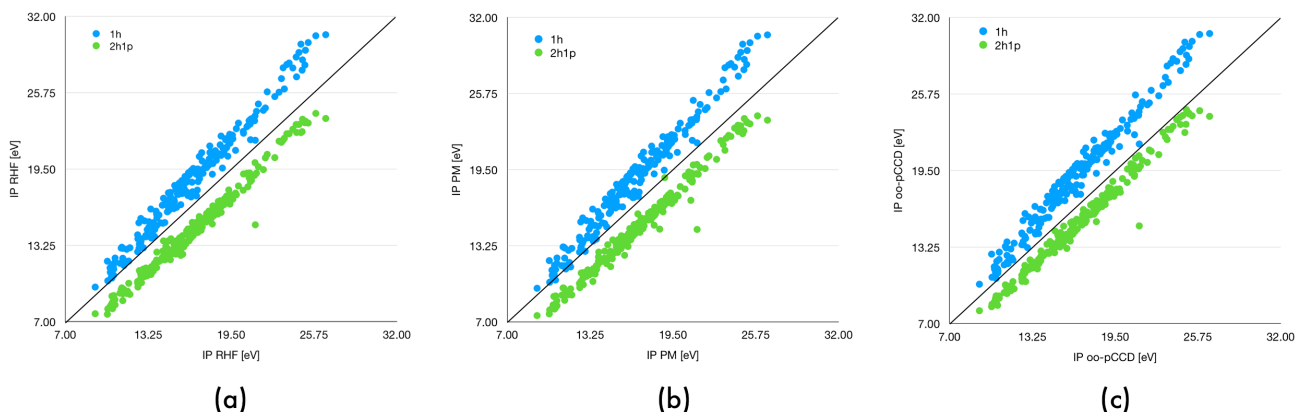

Figure S1: Correlation plots of the vertical ionization energies calculated with the IP-EOM-pCCD method using 1h and 2h1p operators with (a) RHF, (b) PM, and (c) natural orbital-optimized (oo-)pCCD orbitals.

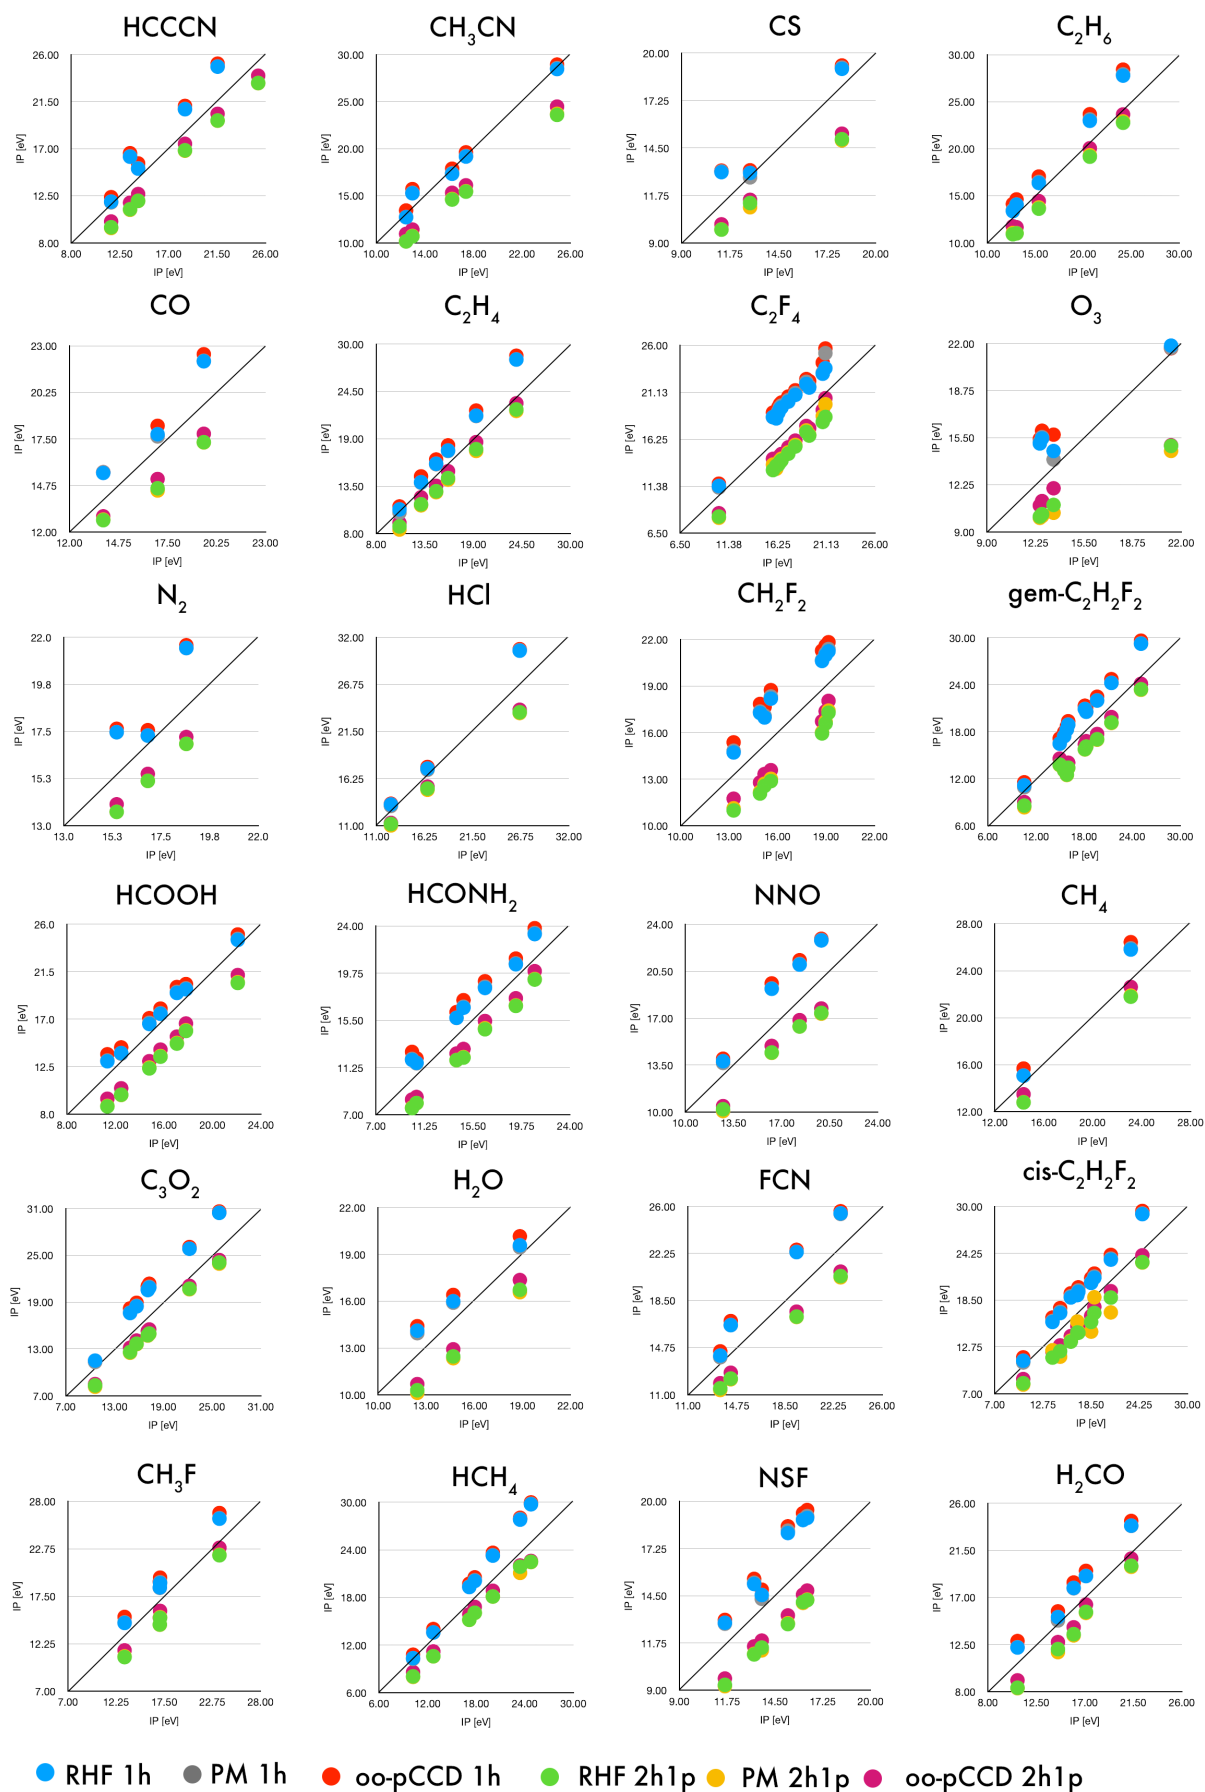

Figure S2: Correlation plots of the vertical ionization energies calculated with the IP-EOM-pCCD method using 1h and 2h1p operators with RHF, PM, and natural orbital-optimized (oo-)pCCD orbitals for individual molecules.

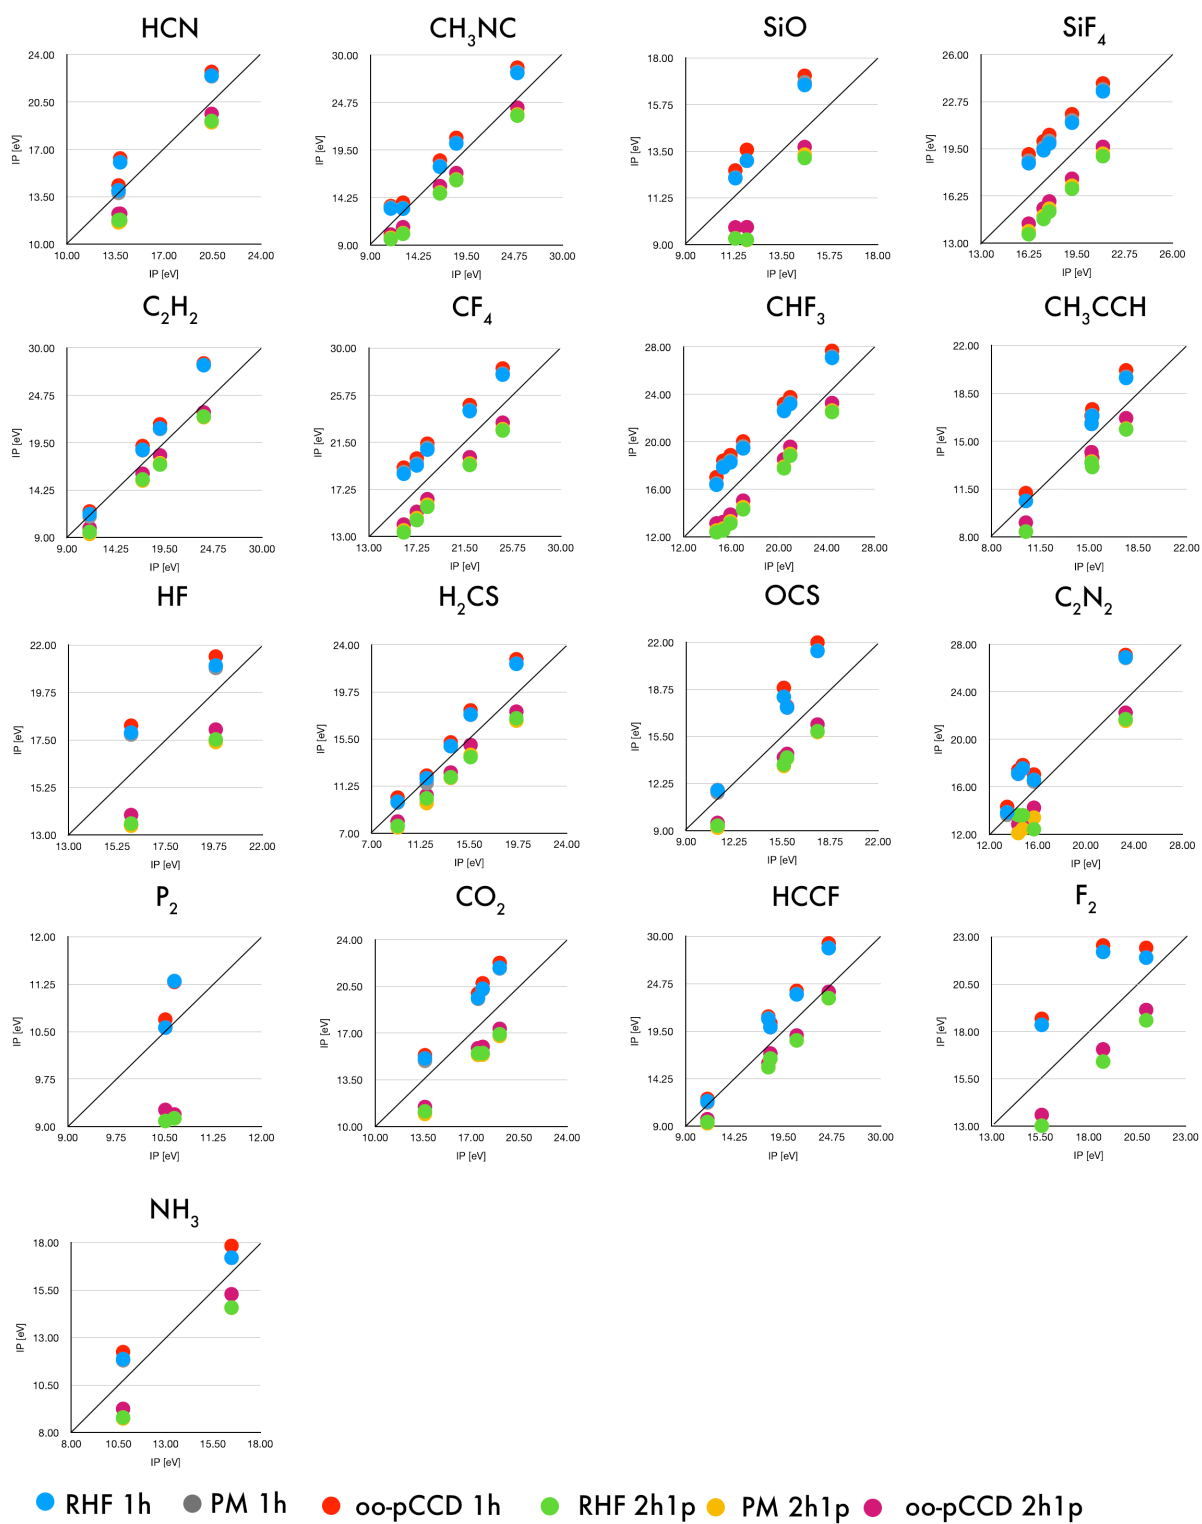

Figure S3: Correlation plots of the vertical ionization energies calculated with the IP-EOM-pCCD method using 1h and 2h1p operators with RHF, PM, and natural orbital-optimized (oo-)pCCD orbitals for individual molecules.



## References

- [1] D. S. Ranasinghe, J. T. Margraf, A. Perera, and R. J. Bartlett. Vertical valence ionization potential benchmarks from equation-of-motion coupled cluster theory and qtp functionals. *J. Chem. Phys.*, 150(7):074108, 2019.
